# Supplementary material for: Ovarian and Energy Status in Lame Dairy Cows at Puerperium and Their Responsiveness in Protocols for the Synchronization of Ovulation
Source: MDPI journal article supplement (doi:10.3390/ani13091537), 2023-05-04
Supplement: s1 [file s1]

**Table S1.** Reproductive parameters and culling rate of control (group C) and lame cows with two presynchronization protocols (groups LC and LP).

| Variable                       | Group               |                   |                   |                 |                   |                 |
|--------------------------------|---------------------|-------------------|-------------------|-----------------|-------------------|-----------------|
|                                | C                   | LC                | LP                | <i>p</i> -Value | LC + LP           | <i>p</i> -Value |
|                                |                     |                   |                   | C vs LC vs LP   |                   | C vs LC + LP    |
| n                              | 27                  | 26                | 26                |                 | 52                |                 |
| Non-cycling (%)                | 11.1 <sup>a,1</sup> | 38.5 <sup>b</sup> | 34.6 <sup>b</sup> | 0.05            | 36.5 <sup>2</sup> | 0.02            |
| Presynchronization success (%) | 81.5                | 65.4              | 76.9              | 0.38            | 71.2              | 0.32            |
| Synchronization success (%)    | 92.6                | 84.6              | 92.3              | 0.65            | 88.5              | 0.71            |
| Ovulation (%)                  | 81.5                | 80.8              | 76.9              | 0.91            | 78.9              | 0.78            |
| Non-cycling Ovulated (%)       | 100                 | 70                | 77.7              | 0.55            | 73.7              | 0.44            |
| FSCR (%)                       | 37.0                | 26.9              | 16.0              | 0.23            | 21.6              | 0.14            |
| Pregnant by 200d (%)           | 88.9                | 70.8              | 87.5              | 0.18            | 79.2              | 0.29            |
| AIs/pregnancy (mean ± SE)      | 3.1 ± 0.4           | 2.8 ± 0.5         | 3.0 ± 0.5         | 0.87            | 2.9 ± 0.3         | 0.75            |
| Days open (median)             | 123                 | 114               | 111               | 0.95            | 112               | 0.94            |
| Culled (%)                     | 0 <sup>a,1</sup>    | 23.1 <sup>b</sup> | 19.2 <sup>b</sup> | 0.03            | 21.2 <sup>2</sup> | 0.01            |

<sup>a,b</sup> Different letters denote statistical differences between the groups Control, Lame Control and Lame Progesterone ( $p < 0.05$ );

<sup>1,2</sup> Different numbers denote statistical differences between the groups Control and all Lame (LC + LP) ( $p < 0.05$ )

**Table S2.** Reproductive parameters and culling rate of cows with elevated  $\beta$ -hydroxybutyric acid (BHBA+) and non-esterified fatty acids (NEFA+) during the study period.

| Variable                       | Group         |               |                         |               |               |                         |
|--------------------------------|---------------|---------------|-------------------------|---------------|---------------|-------------------------|
|                                | BHBA-         | BHBA+         | <i>p</i> -Value<br>BHBA | NEFA-         | NEFA+         | <i>p</i> -Value<br>NEFA |
| n                              | 72            | 7             |                         | 43            | 36            |                         |
| Non-cycling (%)                | 27.8          | 28.6          | 0.96                    | 27.9          | 27.8          | 0.99                    |
| Presynchronization success (%) | 73.6          | 85.7          | 0.48                    | 72.1          | 77.8          | 0.56                    |
| Synchronization success (%)    | 90.3          | 85.7          | 0.70                    | 88.4          | 91.7          | 0.63                    |
| Ovulation (%)                  | 79.2          | 85.7          | 0.68                    | 79.1          | 80.6          | 0.87                    |
| Non-cycling Ovulated (%)       | 80.0          | 50.0          | 0.41                    | 83.3          | 70.0          | 0.62                    |
| FSCR (%)                       | 26.8          | 28.6          | 0.91                    | 27.9          | 25.7          | 0.83                    |
| Pregnant by 200d (%)           | 83.8          | 71.4          | 0.60                    | 82.9          | 82.4          | 0.95                    |
| AIs/pregnancy (mean $\pm$ SE)  | 2.9 $\pm$ 0.3 | 3.6 $\pm$ 1.1 | 0.53                    | 3.2 $\pm$ 0.4 | 2.7 $\pm$ 0.4 | 0.44                    |
| Days open (median)             | 112           | 134           | 0.40                    | 115           | 109           | 0.76                    |
| Culled (%)                     | 15.3          | 0             | 0.58                    | 14.0          | 13.9          | 0.99                    |

**Table S3.** Reproductive parameters and culling rate of cows with moderate or marked lameness and with lesions due to claw horn disruptions (CHDL) or infectious diseases (ID).

| Variable                       | Group          |                   |                 | Group             |                   |                 |
|--------------------------------|----------------|-------------------|-----------------|-------------------|-------------------|-----------------|
|                                | MODERATE       | MARKED            | <i>p</i> -Value | CHDL              | ID                | <i>p</i> -Value |
| n                              | 16             | 36                |                 | 37                | 15                |                 |
| Non-cycling (%)                | 25.0           | 41.7              | 0.25            | 40.5              | 26.7              | 0.35            |
| Presynchronization success (%) | 75.0           | 69.4              | 0.68            | 64.9              | 86.7              | 0.12            |
| Synchronization success (%)    | 93.8           | 86.1              | 0.65            | 83.8              | 100               | 0.10            |
| Ovulation (%)                  | 81.3           | 77.8              | 1.0             | 73.0              | 93.3              | 0.10            |
| Non-cycling Ovulated (%)       | 75.0           | 73.3              | 1.0             | 66.7              | 100.0             | 0.53            |
| FSCR (%)                       | 25.0           | 20.0              | 0.72            | 13.9 <sup>1</sup> | 40.0 <sup>2</sup> | 0.04            |
| Pregnant by 200d (%)           | 81.3           | 78.1              | 1.0             | 73.5              | 92.9              | 0.13            |
| AIs/pregnancy (mean ± SE)      | 3.0 ± 0.5      | 2.8 ± 0.5         | 0.38            | 3.0 ± 0.4         | 2.6 ± 0.6         | 0.40            |
| Days open (median)             | 115            | 111               | 0.84            | 114               | 110               | 0.33            |
| Culled (%)                     | 0 <sup>a</sup> | 30.6 <sup>b</sup> | 0.01            | 21.6              | 20.0              | 0.90            |

<sup>a, b</sup> Different letters denote statistical differences between the groups of moderate and severe lameness ( $p < 0.05$ )

<sup>1, 2</sup> Different numbers denote statistical differences between the groups with Claw Horn Disruption Lesions (CHDL) and Infectious Diseases (ID) ( $p < 0.05$ )
